# Supplementary material for: Do Dogs Provide Information Helpfully?
Source: PubMed Central journal article supplement (PMC4980001; doi:10.1371/journal.pone.0159797), 2016-08-10
Supplement: pone.0159797.s001.pdf [file pone.0159797.s001.pdf]

Dataset for study 1

| Dog     | Trial | Gender | Age | Breed   | Condition | Group | Toyside | Duration Gaze Toy | Duration Gaze Target | Frequency Gaze Alternation Toy | Frequency Gaze Alternation Target | Attention Demo | Indication Target Before Utterance | Indication Target After Utterance |
|---------|-------|--------|-----|---------|-----------|-------|---------|-------------------|----------------------|--------------------------------|-----------------------------------|----------------|------------------------------------|-----------------------------------|
| Akhia   | 1     | Female | 2   | Cross   | empty     | 5     | left    | 21.3              | 5.6                  | 6                              | 0                                 | 13.2           | 0                                  | 1                                 |
| Akhia   | 2     | Female | 2   | Cross   | empty     | 5     | right   | 5.1               | 0                    | 3                              | 0                                 | 13.6           | 1                                  | 1                                 |
| Akhia   | 3     | Female | 2   | Cross   | tool      | 5     | right   | 2.5               | 1.4                  | 0                              | 2                                 | 11.9           | 0                                  | 0                                 |
| Akhia   | 4     | Female | 2   | Cross   | tool      | 5     | left    | 0                 | 0                    | 0                              | 0                                 | 6.2            | 1                                  | 0                                 |
| Akhia   | 5     | Female | 2   | Cross   | random    | 5     | left    | 0                 | 1.4                  | 1                              | 0                                 | 31.8           | 1                                  | 1                                 |
| Akhia   | 6     | Female | 2   | Cross   | random    | 5     | right   | 0                 | 0.6                  | 0                              | 0                                 | 6.8            | 1                                  | 0                                 |
| Balley  | 1     | Female | 4   | Cross   | tool      | 2     | left    | 0.6               | 0                    | 0                              | 0                                 | 6.8            | 0                                  | 0                                 |
| Balley  | 2     | Female | 4   | Cross   | tool      | 2     | right   | 0                 | 0.5                  | 0                              | 0                                 | 14.1           | 1                                  | 0                                 |
| Balley  | 3     | Female | 4   | Cross   | empty     | 2     | right   | 0.6               | 0                    | 2                              | 0                                 | 4.9            | 1                                  | 0                                 |
| Balley  | 4     | Female | 4   | Cross   | empty     | 2     | left    | 12.7              | 0.8                  | 4                              | 0                                 | 10.3           | 0                                  | 0                                 |
| Balley  | 5     | Female | 4   | Cross   | random    | 2     | right   | 2                 | 0.2                  | 2                              | 0                                 | 52.4           | 0                                  | 0                                 |
| Balley  | 6     | Female | 4   | Cross   | random    | 2     | left    | 19.2              | 0                    | 0                              | 0                                 | 11.7           | 0                                  | 0                                 |
| Boomer  | 1     | Female | 3.5 | Gundog  | random    | 3     | right   | 0                 | 0.7                  | 0                              | 0                                 | 8.4            | 0                                  | 0                                 |
| Boomer  | 2     | Female | 3.5 | Gundog  | random    | 3     | left    | 1.9               | 0                    | 3                              | 1                                 | 20.3           | 1                                  | 1                                 |
| Boomer  | 3     | Female | 3.5 | Gundog  | tool      | 3     | left    | 4                 | 0.8                  | 0                              | 0                                 | 5.9            | 0                                  | 0                                 |
| Boomer  | 4     | Female | 3.5 | Gundog  | tool      | 3     | right   | 0                 | 0                    | 0                              | 0                                 | 10.2           | 0                                  | 0                                 |
| Boomer  | 5     | Female | 3.5 | Gundog  | empty     | 3     | left    | 0                 | 0                    | 0                              | 0                                 | 22.2           | 1                                  | 0                                 |
| Boomer  | 6     | Female | 3.5 | Gundog  | empty     | 3     | right   | 1.2               | 0                    | 1                              | 0                                 | 15.7           | 0                                  | 1                                 |
| Charlie | 1     | Male   | 2.5 | Cross   | empty     | 6     | right   | 1.4               | 1                    | 2                              | 2                                 | 16.4           | 1                                  | 1                                 |
| Charlie | 2     | Male   | 2.5 | Cross   | empty     | 6     | left    | 5.6               | 2.1                  | 2                              | 3                                 | 11.3           | 0                                  | 1                                 |
| Charlie | 3     | Male   | 2.5 | Cross   | random    | 6     | right   | 5.8               | 2.6                  | 0                              | 0                                 | 13.3           | 0                                  | 1                                 |
| Charlie | 4     | Male   | 2.5 | Cross   | random    | 6     | left    | 2.5               | 1                    | 2                              | 1                                 | 11.3           | 0                                  | 1                                 |
| Charlie | 5     | Male   | 2.5 | Cross   | tool      | 6     | left    | 1                 | 1.1                  | 1                              | 1                                 | 22.5           | 0                                  | 1                                 |
| Charlie | 6     | Male   | 2.5 | Cross   | tool      | 6     | right   | 0.6               | 0.6                  | 1                              | 2                                 | 8.7            | 0                                  | 1                                 |
| Cruse   | 1     | Male   | 4   | Working | tool      | 1     | left    | 3.1               | 4.2                  | 2                              | 0                                 | 46.8           | 0                                  | 0                                 |
| Cruse   | 2     | Male   | 4   | Working | tool      | 1     | right   | 3.8               | 0.7                  | 1                              | 2                                 | 55.3           | 1                                  | 1                                 |
| Cruse   | 3     | Male   | 4   | Working | random    | 1     | right   | 0.5               | 0.6                  | 0                              | 0                                 | 58.5           | 1                                  | 1                                 |
| Cruse   | 4     | Male   | 4   | Working | random    | 1     | left    | 1                 | 0.5                  | 1                              | 0                                 | 8.0            | 1                                  | 0                                 |
| Cruse   | 5     | Male   | 4   | Working | empty     | 1     | right   | 0                 | 0                    | 0                              | 0                                 | 54.7           | 0                                  | 1                                 |
| Cruse   | 6     | Male   | 4   | Working | empty     | 1     | left    | 0                 | 0                    | 0                              | 0                                 | 43.7           | 0                                  | 0                                 |
| Dakota  | 1     | Female | 2   | Cross   | tool      | 1     | right   | 2                 | 3.5                  | 1                              | 2                                 | 12.5           | 0                                  | 0                                 |
| Dakota  | 2     | Female | 2   | Cross   | tool      | 1     | left    | 7.2               | 0.5                  | 3                              | 0                                 | 5.0            | 0                                  | 0                                 |
| Dakota  | 3     | Female | 2   | Cross   | random    | 1     | left    | 4                 | 1.2                  | 0                              | 2                                 | 19.2           | 1                                  | 1                                 |
| Dakota  | 4     | Female | 2   | Cross   | random    | 0     | right   | 0                 | 0                    | 0                              | 0                                 | 14.5           | 0                                  | 0                                 |
| Dakota  | 5     | Female | 2   | Cross   | empty     | 1     | left    | 0                 | 0                    | 0                              | 0                                 | 19.6           | 0                                  | 0                                 |
| Dakota  | 6     | Female | 2   | Cross   | empty     | 1     | right   | 1.4               | 2.5                  | 2                              | 1                                 | 1.0            | 1                                  | 1                                 |
| Harry   | 1     | Male   | 3.5 | Cross   | empty     | 6     | left    | 9.4               | 0.6                  | 4                              | 0                                 | 17.9           | 0                                  | 0                                 |
| Harry   | 2     | Male   | 3.5 | Cross   | empty     | 6     | right   | 0                 | 0                    | 9                              | 0                                 | 4.7            | 1                                  | 0                                 |
| Harry   | 3     | Male   | 3.5 | Cross   | random    | 6     | left    | 2.3               | 4.7                  | 6                              | 4                                 | 7.6            | 0                                  | 1                                 |
| Harry   | 4     | Male   | 3.5 | Cross   | random    | 6     | right   | 6                 | 2.3                  | 6                              | 0                                 | 20.6           | 0                                  | 0                                 |
| Harry   | 5     | Male   | 3.5 | Cross   | tool      | 6     | left    | 6.8               | 2.3                  | 5                              | 3                                 | 7.2            | 0                                  | 0                                 |
| Harry   | 6     | Male   | 3.5 | Cross   | tool      | 6     | right   | 0.6               | 1                    | 1                              | 1                                 | 9.3            | 0                                  | 0                                 |
| Hudson  | 1     | Male   | 4   | Terrier | random    | 4     | left    | 0.9               | 0.9                  | 0                              | 0                                 | 2.8            | 0                                  | 1                                 |
| Hudson  | 2     | Male   | 4   | Terrier | random    | 4     | right   | 1.4               | 1.6                  | 2                              | 1                                 | 21.2           | 1                                  | 0                                 |
| Hudson  | 3     | Male   | 4   | Terrier | empty     | 4     | left    | 2.1               | 0.5                  | 2                              | 0                                 | 5.7            | 0                                  | 0                                 |
| Hudson  | 4     | Male   | 4   | Terrier | empty     | 4     | right   | 2.4               | 0.6                  | 3                              | 0                                 | 20.0           | 0                                  | 0                                 |
| Hudson  | 5     | Male   | 4   | Terrier | tool      | 4     | left    | 1.5               | 1.4                  | 1                              | 3                                 | 2.5            | 0                                  | 1                                 |
| Hudson  | 6     | Male   | 4   | Terrier | tool      | 4     | right   | 12.4              | 0.8                  | 4                              | 0                                 | 11.2           | 0                                  | 0                                 |
| Iggy    | 1     | Male   | 5   | Gundog  | random    | 3     | right   | 2.8               | 0                    | 0                              | 2                                 | 15.8           | 0                                  | 0                                 |
| Iggy    | 2     | Male   | 5   | Gundog  | random    | 3     | left    | 1.1               | 1                    | 2                              | 1                                 | 16.1           | 0                                  | 1                                 |
| Iggy    | 3     | Male   | 5   | Gundog  | tool      | 3     | left    | 0                 | 0.5                  | 0                              | 0                                 | 12.4           | 0                                  | 0                                 |
| Iggy    | 4     | Male   | 5   | Gundog  | tool      | 3     | right   | 0.9               | 0.7                  | 1                              | 0                                 | 21.2           | 0                                  | 1                                 |
| Iggy    | 5     | Male   | 5   | Gundog  | empty     | 3     | right   | 0                 | 0                    | 0                              | 0                                 | 27.1           | 1                                  | 0                                 |
| Iggy    | 6     | Male   | 5   | Gundog  | empty     | 2     | left    | 0.6               | 0                    | 2                              | 0                                 | 0.6            | 0                                  | 0                                 |
| Jeff    | 1     | Male   | 7.5 | Terrier | tool      | 2     | left    | 0.5               | 3.2                  | 0                              | 2                                 | 26.5           | 0                                  | 0                                 |
| Jeff    | 2     | Male   | 7.5 | Terrier | tool      | 2     | right   | 2.4               | 4.3                  | 4                              | 0                                 | 34.1           | 0                                  | 0                                 |
| Jeff    | 3     | Male   | 7.5 | Terrier | empty     | 2     | left    | 2.4               | 0.8                  | 0                              | 0                                 | 8              | 0                                  | 1                                 |
| Jeff    | 4     | Male   | 7.5 | Terrier | empty     | 2     | right   | 0.9               | 0.7                  | 1                              | 1                                 | 38.4           | 0                                  | 0                                 |
| Jeff    | 5     | Male   | 7.5 | Terrier | random    | 2     | right   | 0                 | 0                    | 0                              | 0                                 | 29.9           | 1                                  | 1                                 |
| Jeff    | 6     | Male   | 7.5 | Terrier | random    | 2     | left    | 0.5               | 3.8                  | 0                              | 0                                 | 17.5           | 0                                  | 0                                 |
| Koko    | 1     | Female | 3.5 | Hound   | empty     | 5     | left    | 0.5               | 1.7                  | 1                              | 0                                 | 20.0           | 1                                  | 1                                 |
| Koko    | 2     | Female | 3.5 | Hound   | empty     | 5     | left    | 1.6               | 4.2                  | 1                              | 1                                 | 16.7           | 1                                  | 1                                 |
| Koko    | 3     | Female | 3.5 | Hound   | tool      | 5     | left    | 6.2               | 1.3                  | 3                              | 0                                 | 14.9           | 0                                  | 0                                 |
| Koko    | 4     | Female | 3.5 | Hound   | tool      | 5     | right   | 0                 | 2.7                  | 0                              | 1                                 | 10.4           | 0                                  | 0                                 |
| Koko    | 5     | Female | 3.5 | Hound   | random    | 5     | left    | 0.5               | 1.5                  | 0                              | 0                                 | 16.3           | 1                                  | 1                                 |
| Koko    | 6     | Female | 3.5 | Hound   | random    | 5     | right   | 1.9               | 2.7                  | 2                              | 0                                 | 1.9            | 0                                  | 0                                 |
| Lanson  | 1     | Male   | 2   | Gundog  | random    | 4     | right   | 0                 | 0                    | 0                              | 0                                 | 6.9            | 1                                  | 1                                 |
| Lanson  | 2     | Male   | 2   | Gundog  | random    | 4     | left    | 0                 | 0                    | 0                              | 0                                 | 12.4           | 0                                  | 0                                 |
| Lanson  | 3     | Male   | 2   | Gundog  | empty     | 4     | left    | 0                 | 0                    | 0                              | 0                                 | 12.4           | 0                                  | 0                                 |
| Lanson  | 4     | Male   | 2   | Gundog  | empty     | 4     | right   | 0.9               | 0.8                  | 0                              | 0                                 | 18.6           | 0                                  | 0                                 |
| Lanson  | 5     | Male   | 2   | Gundog  | empty     | 4     | left    | 0                 | 0                    | 0                              | 0                                 | 12.2           | 0                                  | 0                                 |
| Lanson  | 6     | Male   | 2   | Gundog  | tool      | 4     | left    | 0                 | 0                    | 0                              | 0                                 | 32.6           | 1                                  | 1                                 |
| Maddie  | 1     | Female | 3.5 | Utility | tool      | 2     | left    | 4.9               | 0                    | 0                              | 0                                 | 4.3            | 0                                  | 1                                 |
| Maddie  | 2     | Female | 3.5 | Utility | tool      | 2     | right   | 0.6               | 1.9                  | 0                              | 0                                 | 0.6            | 0                                  | 0                                 |
| Maddie  | 3     | Female | 3.5 | Utility | empty     | 2     | left    | 2                 | 0                    | 0                              | 0                                 | 11.1           | 0                                  | 0                                 |
| Maddie  | 4     | Female | 3.5 | Utility | empty     | 2     | right   | 1.7               | 5.2                  | 0                              | 0                                 | 4.8            | 1                                  | 0                                 |
| Maddie  | 5     | Female | 3.5 | Utility | empty     | 2     | left    | 2.3               | 0.6                  | 1                              | 2                                 | 20.8           | 0                                  | 1                                 |
| Maddie  | 6     | Female | 3.5 | Utility | random    | 2     | right   | 0                 | 2.9                  | 0                              | 0                                 | 11.7           | 1                                  | 1                                 |
| MaxM    | 1     | Male   | 8   | Cross   | tool      | 1     | right   | 16.5              | 0                    | 3                              | 1                                 | 16.4           | 0                                  | 0                                 |
| MaxM    | 2     | Male   | 8   | Cross   | tool      | 1     | left    | 0.2               | 1.3                  | 0                              | 0                                 | 10.8           | 0                                  | 0                                 |
| MaxM    | 3     | Male   | 8   | Cross   | random    | 1     | right   | 6.1               | 2.7                  | 0                              | 1                                 | 28.1           | 1                                  | 0                                 |
| MaxM    | 4     | Male   | 8   | Cross   | random    | 1     | left    | 4.5               | 1.3                  | 1                              | 5                                 | 14.9           | 1                                  | 0                                 |
| MaxM    | 5     | Male   | 8   | Cross   | empty     | 1     | left    | 3.5               | 1                    | 1                              | 0                                 | 15.5           | 1                                  | 0                                 |
| MaxM    | 6     | Male   | 8   | Cross   | empty     | 1     | right   | 5.8               | 7.9                  | 3                              | 0                                 | 30.6           | 1                                  | 1                                 |
| Millie  | 1     | Female | 1.5 | Gundog  | tool      | 1     | left    | 0                 | 0.9                  | 0                              | 0                                 | 0              | 0                                  | 1                                 |
| Millie  | 2     | Female | 1.5 | Gundog  | tool      | 1     | right   | 0                 | 0                    | 2                              | 0                                 | 2.6            | 0                                  | 1                                 |
| Millie  | 3     | Female | 1.5 | Gundog  | random    | 1     | right   | 0                 | 0                    | 0                              | 0                                 | 13.9           | 0                                  | 0                                 |
| Millie  | 4     | Female | 1.5 | Gundog  | random    | 1     | left    | 0.5               | 0                    | 0                              | 0                                 | 17.1           | 0                                  | 1                                 |
| Millie  | 5     | Female | 1.5 | Gundog  | empty     | 1     | left    | 1.1               | 0                    | 1                              | 0                                 | 15.0           | 0                                  | 0                                 |
| Millie  | 6     | Female | 1.5 | Gundog  | empty     | 1     | right   | 0                 | 0                    | 0                              | 0                                 | 18.6           | 1                                  | 0                                 |
| Moet    | 1     | Male   | 4   | Gundog  | random    | 4     | left    | 0.5               | 1.7                  | 0                              | 0                                 | 10.0           | 0                                  | 0                                 |
| Moet    | 2     | Male   | 4   | Gundog  | random    | 4     | right   | 0                 | 0.7                  | 1                              | 0                                 | 14.9           | 0                                  | 0                                 |
| Moet    | 3     | Male   | 4   | Gundog  | empty     | 4     | right   | 0                 | 0                    | 0                              | 0                                 | 11.6           | 1                                  | 0                                 |
| Moet    | 4     | Male   | 4   | Gundog  | empty     | 4     | left    | 0                 | 0                    | 0                              | 0                                 | 14.7           | 0                                  | 0                                 |
| Moet    | 5     | Male   | 4   | Gundog  | tool      | 4     | right   | 0                 | 0                    | 0                              | 0                                 | 0.0            | 0                                  | 1                                 |
| Moet    | 6     | Male   | 4   | Gundog  | tool      | 4     | left    | 0                 | 0                    | 0                              | 0                                 | 10.9           | 0                                  | 0                                 |
| Moses   | 1     | Female | 6   | Cross   | random    | 3     | right   | 0.6               | 0.6                  | 1                              | 0                                 | 27.1           | 1                                  | 0                                 |
| Moses   | 2     | Female | 6   | Cross   | random    | 3     | left    | 0                 | 0                    | 2                              | 0                                 | 2.8            | 0                                  | 0                                 |
| Moses   | 3     | Female | 6   | Cross   | tool      | 3     | left    | 0                 | 0                    | 0                              | 0                                 | 12.4           | 0                                  | 0                                 |
| Moses   | 4     | Female | 6   | Cross   | tool      | 3     | right   | 0.3               | 0.5                  | 2                              | 0                                 | 0              | 0                                  | 0                                 |
| Moses   | 5     | Female | 6   | Cross   | empty     | 3     | left    | 1.5               | 0.8                  | 0                              | 0                                 | 18.1           | 0                                  | 1                                 |
| Moses   | 6     | Female | 6   | Cross   | empty     | 3     | right   | 0                 | 0                    | 0                              | 0                                 | 7.3            | 0                                  | 0                                 |
| Poppyp  | 1     | Female | 3   | Cross   | random    | 3     | right   | 1                 | 1.1                  | 4                              | 1                                 | 8.4            | 0                                  | 0                                 |
| Poppyp  | 2     | Female | 3   | Cross   | random    | 3     | left    | 1.5               | 0                    | 0                              | 0                                 | 19.9           | 0                                  | 1                                 |
| Poppyp  | 3     | Female | 3   | Cross   | tool      | 3     | left    | 1                 | 1.2                  | 1                              | 1                                 | 7.0            | 0                                  | 1                                 |
| Poppyp  | 4     | Female | 3   | Cross   | tool      | 3     | right   | 0                 | 0                    | 0                              | 0                                 | 9.6            | 0                                  | 0                                 |
| Poppyp  | 5     | Female | 3   | Cross   | empty     | 3     | left    | 7.6               | 11.7                 | 0                              | 0                                 | 13.3           | 1                                  | 1                                 |
| Poppyp  | 6     | Female | 3   | Cross   | empty     | 3     | right   | 1.1               | 1.4                  | 1                              | 1                                 | 3.1            | 0                                  | 0                                 |
| Rigby   | 1     | Male   | 5   | Cross   | empty     | 6     | left    | 0                 | 0                    | 1                              | 0                                 | 5.1            | 0                                  | 0                                 |
| Rigby   | 2     | Male   | 5   | Cross   | empty     | 6     | right   | 0                 | 0.5                  | 0                              | 0                                 | 6.3            | 0                                  | 0                                 |
| Rigby   | 3     | Male   | 5   | Cross   | random    | 6     | left    | 0                 | 2.5                  | 0                              | 1                                 | 0              | 0                                  | 1                                 |
| Rigby   | 4     | Male   | 5   | Cross   | random    | 6     | right   | 0                 | 0                    | 0                              | 0                                 | 37.5           | 0                                  | 0                                 |
| Rigby   | 5     | Male   | 5   | Cross   | tool      | 6     | left    | 0                 | 0                    | 0                              | 0                                 | 3.8            | 0                                  | 0                                 |
| Rigby   | 6     | Male   | 5   | Cross   | tool      | 6     | right   | 0                 | 0                    | 0                              | 0                                 | 7.7            | 1                                  | 1                                 |
| Rumsy   | 1     | Male   | 2.5 | Cross   | empty     | 5     | left    | 5.4               | 1.5                  | 3                              | 0                                 | 6.4            | 0                                  | 0                                 |
| Rumsy   | 2     | Male   | 2.5 | Cross   | empty     | 5     | right   | 4.2               | 1                    | 0                              | 0                                 | 4.1            | 0                                  | 0                                 |
| Rumsy   | 3     | Male   | 2.5 | Cross   | tool      | 5     | right   | 5                 | 0.7                  | 0                              | 0                                 | 14.5           | 0                                  | 0                                 |
| Rumsy   | 4     | Male   | 2.5 | Cross   | tool      | 5     | left    | 0                 | 0                    | 0                              | 0                                 | 57.8           | 0                                  | 1                                 |
| Rumsy   | 5     | Male   | 2.5 | Cross   | random    | 5     | left    | 0                 | 4.7                  | 0                              | 0                                 | 11.2           | 1                                  | 1                                 |
| Rumsy   | 6     | Male   | 2.5 | Cross   | random    | 5     | right   | 0                 | 20.3</               |                                |                                   |                |                                    |                                   |

|           |        |          |     |   |            |        |                          |   |      |      |       |
|-----------|--------|----------|-----|---|------------|--------|--------------------------|---|------|------|-------|
| Ben       | Male   | Cross    | 1.5 | 1 | Relevant   | Vocal  | Relevant, Vocal-Silent   | 0 | 0    | 0.25 | 23.78 |
| Ben       | Male   | Cross    | 1.5 | 1 | Relevant   | Vocal  | Relevant, Vocal-Silent   | 1 | 1    | 0    | 19.57 |
| Ben       | Male   | Cross    | 1.5 | 3 | Relevant   | Vocal  | Relevant, Vocal-Silent   | 0 | 0.8  | 0    | 32.69 |
| Ben       | Male   | Cross    | 1.5 | 4 | Relevant   | Silent | Relevant, Vocal-Silent   | 1 | 0.6  | 0    | 31.1  |
| Ben       | Male   | Cross    | 1.5 | 5 | Relevant   | Silent | Relevant, Vocal-Silent   | 1 | 0.9  | 0    | 19.54 |
| Ben       | Male   | Cross    | 1.5 | 6 | Relevant   | Silent | Relevant, Vocal-Silent   | 1 | 0.5  | 0.5  | 10.95 |
| Blue      | Male   | Gundog   | 9.5 | 1 | Irrelevant | Vocal  | Irrelevant, Vocal-Silent | 0 | 6.2  | 0    | 17.05 |
| Blue      | Male   | Gundog   | 9.5 | 2 | Irrelevant | Vocal  | Irrelevant, Vocal-Silent | 0 | 0.5  | 0.5  | 11.67 |
| Blue      | Male   | Gundog   | 9.5 | 3 | Irrelevant | Vocal  | Irrelevant, Vocal-Silent | 2 | 1.2  | 0    | 60.38 |
| Blue      | Male   | Gundog   | 9.5 | 4 | Irrelevant | Silent | Irrelevant, Vocal-Silent | 0 | 0    | 1    | 0.55  |
| Blue      | Male   | Gundog   | 9.5 | 5 | Irrelevant | Silent | Irrelevant, Vocal-Silent | 0 | 0    | 0.7  | 35.35 |
| Blue      | Male   | Gundog   | 9.5 | 6 | Irrelevant | Silent | Irrelevant, Vocal-Silent | 0 | 0    | 0    | 32.23 |
| Bob       | Male   | Cross    | 3   | 1 | Relevant   | Silent | Relevant, Silent-Vocal   | 1 | 2.1  | 1    | 0.25  |
| Bob       | Male   | Cross    | 3   | 2 | Relevant   | Silent | Relevant, Silent-Vocal   | 0 | 0    | 0    | 1.8   |
| Bob       | Male   | Cross    | 3   | 3 | Relevant   | Silent | Relevant, Silent-Vocal   | 1 | 0.5  | 1    | 18.86 |
| Bob       | Male   | Cross    | 3   | 4 | Relevant   | Vocal  | Relevant, Silent-Vocal   | 2 | 0.5  | 0    | 23.96 |
| Bob       | Male   | Cross    | 3   | 5 | Relevant   | Vocal  | Relevant, Silent-Vocal   | 2 | 3.1  | 0    | 7.79  |
| Bob       | Male   | Cross    | 3   | 6 | Relevant   | Vocal  | Relevant, Silent-Vocal   | 0 | 0    | 0    | 62.21 |
| Bollinger | Male   | Cross    | 7.5 | 1 | Irrelevant | Silent | Irrelevant, Silent-Vocal | 2 | 0.7  | 0    | 0.45  |
| Bollinger | Male   | Cross    | 7.5 | 2 | Irrelevant | Silent | Irrelevant, Silent-Vocal | 0 | 0    | 0    | 8.51  |
| Bollinger | Male   | Cross    | 7.5 | 3 | Irrelevant | Silent | Irrelevant, Silent-Vocal | 0 | 0    | 1    | 0.65  |
| Bollinger | Male   | Cross    | 7.5 | 4 | Irrelevant | Vocal  | Irrelevant, Silent-Vocal | 0 | 0    | 0    | 32.62 |
| Bollinger | Male   | Cross    | 7.5 | 5 | Irrelevant | Vocal  | Irrelevant, Silent-Vocal | 0 | 0    | 0    | 25.41 |
| Bollinger | Male   | Cross    | 7.5 | 6 | Irrelevant | Vocal  | Irrelevant, Silent-Vocal | 0 | 0    | 0.25 | 26.86 |
| Bonnie    | Male   | Cross    | 2   | 1 | Irrelevant | Silent | Irrelevant, Silent-Vocal | 0 | 0    | 0    | 10.74 |
| Bonnie    | Male   | Cross    | 2   | 2 | Irrelevant | Silent | Irrelevant, Silent-Vocal | 0 | 0.6  | 0    | 11.86 |
| Bonnie    | Male   | Cross    | 2   | 3 | Irrelevant | Silent | Irrelevant, Silent-Vocal | 0 | 3.8  | 0    | 8.19  |
| Bonnie    | Male   | Cross    | 2   | 4 | Irrelevant | Vocal  | Irrelevant, Silent-Vocal | 0 | 0    | 0.45 | 13.38 |
| Bonnie    | Male   | Cross    | 2   | 5 | Irrelevant | Vocal  | Irrelevant, Silent-Vocal | 0 | 0.6  | 1    | 25.73 |
| Bonnie    | Male   | Cross    | 2   | 6 | Irrelevant | Vocal  | Irrelevant, Silent-Vocal | 0 | 0    | 0    | 30.63 |
| Bonnie    | Male   | Cross    | 2   | 7 | Irrelevant | Vocal  | Irrelevant, Silent-Vocal | 0 | 0    | 0.4  | 4.99  |
| Brian     | Male   | Gundog   | 5   | 1 | Relevant   | Silent | Relevant, Silent-Vocal   | 0 | 0.45 | 0    | 39.22 |
| Brian     | Male   | Gundog   | 5   | 2 | Relevant   | Silent | Relevant, Silent-Vocal   | 0 | 0    | 0    | 14.74 |
| Brian     | Male   | Gundog   | 5   | 3 | Relevant   | Silent | Relevant, Silent-Vocal   | 0 | 3.1  | 0    | 13.62 |
| Brian     | Male   | Gundog   | 5   | 4 | Relevant   | Silent | Relevant, Silent-Vocal   | 0 | 5.7  | 0    | 16.61 |
| Brian     | Male   | Gundog   | 5   | 5 | Relevant   | Vocal  | Relevant, Silent-Vocal   | 3 | 1.5  | 0    | 0.75  |
| Brian     | Male   | Gundog   | 5   | 6 | Relevant   | Vocal  | Relevant, Silent-Vocal   | 2 | 1.9  | 0    | 15.14 |
| Brocken   | Male   | Gundog   | 3   | 1 | Irrelevant | Vocal  | Irrelevant, Vocal-Silent | 0 | 1.6  | 0    | 22.15 |
| Brocken   | Male   | Gundog   | 3   | 2 | Irrelevant | Vocal  | Irrelevant, Vocal-Silent | 0 | 0    | 0    | 16.34 |
| Brocken   | Male   | Gundog   | 3   | 3 | Irrelevant | Vocal  | Irrelevant, Vocal-Silent | 1 | 0.5  | 0.5  | 23.38 |
| Brocken   | Male   | Gundog   | 3   | 4 | Irrelevant | Silent | Irrelevant, Vocal-Silent | 0 | 0    | 0    | 19.38 |
| Brocken   | Male   | Gundog   | 3   | 5 | Irrelevant | Silent | Irrelevant, Vocal-Silent | 0 | 0    | 1    | 0.25  |
| Brocken   | Male   | Gundog   | 3   | 6 | Irrelevant | Silent | Irrelevant, Vocal-Silent | 0 | 0    | 2.5  | 1.05  |
| Buzz      | Male   | Cross    | 2   | 1 | Relevant   | Vocal  | Relevant, Vocal-Silent   | 0 | 0    | 0    | 11.15 |
| Buzz      | Male   | Cross    | 2   | 2 | Relevant   | Vocal  | Relevant, Vocal-Silent   | 0 | 0    | 0.65 | 26.56 |
| Buzz      | Male   | Cross    | 2   | 3 | Irrelevant | Vocal  | Relevant, Vocal-Silent   | 1 | 0    | 0    | 15.24 |
| Buzz      | Male   | Cross    | 2   | 4 | Irrelevant | Silent | Relevant, Vocal-Silent   | 0 | 0    | 0    | 39.70 |
| Buzz      | Male   | Cross    | 2   | 5 | Irrelevant | Silent | Relevant, Vocal-Silent   | 1 | 2.7  | 0    | 1.2   |
| Buzz      | Male   | Cross    | 2   | 6 | Irrelevant | Silent | Relevant, Vocal-Silent   | 0 | 1.6  | 0    | 13.49 |
| BuzzG     | Male   | Cross    | 3.5 | 1 | Irrelevant | Vocal  | Irrelevant, Vocal-Silent | 0 | 0    | 0    | 4.45  |
| BuzzG     | Male   | Cross    | 3.5 | 2 | Irrelevant | Vocal  | Irrelevant, Vocal-Silent | 0 | 0.5  | 0.5  | 5.5   |
| BuzzG     | Male   | Cross    | 3.5 | 3 | Irrelevant | Vocal  | Irrelevant, Vocal-Silent | 0 | 2.8  | 1    | 17.02 |
| BuzzG     | Male   | Cross    | 3.5 | 4 | Irrelevant | Silent | Irrelevant, Vocal-Silent | 0 | 0    | 1    | 15.81 |
| BuzzG     | Male   | Cross    | 3.5 | 5 | Irrelevant | Silent | Irrelevant, Vocal-Silent | 0 | 0    | 0    | 35.53 |
| BuzzG     | Male   | Cross    | 3.5 | 6 | Irrelevant | Silent | Irrelevant, Vocal-Silent | 2 | 1.5  | 1.5  | 11.73 |
| Cassidy   | Male   | Cross    | 2   | 1 | Relevant   | Vocal  | Relevant, Vocal-Silent   | 0 | 0    | 0.6  | 50.97 |
| Cassidy   | Male   | Cross    | 2   | 2 | Relevant   | Vocal  | Relevant, Vocal-Silent   | 1 | 0.5  | 0    | 38.91 |
| Cassidy   | Male   | Cross    | 2   | 3 | Relevant   | Vocal  | Relevant, Vocal-Silent   | 0 | 0    | 0.3  | 17.52 |
| Cassidy   | Male   | Cross    | 2   | 4 | Relevant   | Silent | Relevant, Vocal-Silent   | 1 | 0.5  | 0.5  | 36.09 |
| Cassidy   | Male   | Cross    | 2   | 5 | Relevant   | Silent | Relevant, Vocal-Silent   | 0 | 0    | 0    | 0.3   |
| Cassidy   | Male   | Cross    | 2   | 6 | Relevant   | Silent | Relevant, Vocal-Silent   | 0 | 0    | 0    | 10.77 |
| Daisy     | Female | Cross    | 2.5 | 1 | Relevant   | Silent | Relevant, Silent-Vocal   | 1 | 0    | 0.5  | 22.03 |
| Daisy     | Female | Cross    | 2.5 | 2 | Relevant   | Silent | Relevant, Silent-Vocal   | 0 | 0.5  | 0.5  | 0.65  |
| Daisy     | Female | Cross    | 2.5 | 3 | Relevant   | Silent | Relevant, Silent-Vocal   | 1 | 0.6  | 1.5  | 13.86 |
| Daisy     | Female | Cross    | 2.5 | 4 | Relevant   | Vocal  | Relevant, Silent-Vocal   | 0 | 0    | 0    | 38.01 |
| Daisy     | Female | Cross    | 2.5 | 5 | Relevant   | Vocal  | Relevant, Silent-Vocal   | 0 | 0    | 0    | 39.09 |
| Daisy     | Female | Cross    | 2.5 | 6 | Relevant   | Vocal  | Relevant, Silent-Vocal   | 3 | 1.5  | 0.3  | 64.88 |
| Hugo      | Male   | Terrier  | 2   | 1 | Relevant   | Vocal  | Irrelevant, Silent-Vocal | 1 | 0.7  | 0    | 1.6   |
| Hugo      | Male   | Terrier  | 2   | 2 | Relevant   | Vocal  | Irrelevant, Silent-Vocal | 1 | 4.5  | 0    | 16.62 |
| Hugo      | Male   | Terrier  | 2   | 3 | Relevant   | Vocal  | Irrelevant, Silent-Vocal | 0 | 6.2  | 0    | 37.76 |
| Hugo      | Male   | Terrier  | 2   | 4 | Relevant   | Silent | Irrelevant, Silent-Vocal | 0 | 0    | 0    | 15.32 |
| Hugo      | Male   | Terrier  | 2   | 5 | Relevant   | Silent | Irrelevant, Silent-Vocal | 0 | 0    | 0    | 4.1   |
| Hugo      | Male   | Terrier  | 2   | 6 | Relevant   | Silent | Irrelevant, Silent-Vocal | 0 | 5.7  | 0    | 20.60 |
| Isabelle  | Female | Working  | 2   | 1 | Relevant   | Vocal  | Relevant, Vocal-Silent   | 1 | 2.4  | 0    | 21.62 |
| Isabelle  | Female | Working  | 2   | 2 | Relevant   | Vocal  | Relevant, Vocal-Silent   | 2 | 2.4  | 0    | 17.59 |
| Isabelle  | Female | Working  | 2   | 3 | Relevant   | Vocal  | Relevant, Vocal-Silent   | 1 | 0.9  | 0.5  | 19.06 |
| Isabelle  | Female | Working  | 2   | 4 | Relevant   | Silent | Relevant, Vocal-Silent   | 0 | 0    | 0.5  | 0.85  |
| Isabelle  | Female | Working  | 2   | 5 | Relevant   | Silent | Relevant, Vocal-Silent   | 0 | 0    | 0    | 35.80 |
| Isabelle  | Female | Working  | 2   | 6 | Relevant   | Silent | Relevant, Vocal-Silent   | 1 | 0.5  | 0    | 22.37 |
| Jago      | Male   | Working  | 5   | 1 | Irrelevant | Silent | Irrelevant, Silent-Vocal | 1 | 0.6  | 0    | 1     |
| Jago      | Male   | Working  | 5   | 2 | Irrelevant | Silent | Irrelevant, Silent-Vocal | 0 | 2    | 0    | 1.85  |
| Jago      | Male   | Working  | 5   | 3 | Irrelevant | Silent | Irrelevant, Silent-Vocal | 0 | 0    | 0    | 2.45  |
| Jago      | Male   | Working  | 5   | 4 | Irrelevant | Vocal  | Irrelevant, Silent-Vocal | 0 | 1.2  | 0    | 0     |
| Jago      | Male   | Working  | 5   | 5 | Irrelevant | Vocal  | Irrelevant, Silent-Vocal | 0 | 1.3  | 0    | 13.97 |
| Jago      | Male   | Working  | 5   | 6 | Irrelevant | Vocal  | Irrelevant, Silent-Vocal | 3 | 2.2  | 0    | 3.2   |
| Jango     | Male   | Working  | 10  | 1 | Relevant   | Silent | Relevant, Silent-Vocal   | 1 | 0    | 0    | 4.75  |
| Jango     | Male   | Working  | 10  | 2 | Relevant   | Silent | Relevant, Silent-Vocal   | 0 | 0.5  | 1.5  | 1.3   |
| Jango     | Male   | Working  | 10  | 3 | Relevant   | Silent | Relevant, Silent-Vocal   | 0 | 0    | 1.5  | 9.71  |
| Jango     | Male   | Working  | 10  | 4 | Relevant   | Vocal  | Relevant, Silent-Vocal   | 0 | 3.3  | 1.5  | 2.6   |
| Jango     | Male   | Working  | 10  | 5 | Relevant   | Vocal  | Relevant, Silent-Vocal   | 0 | 1.6  | 0    | 10.23 |
| Jango     | Male   | Working  | 10  | 6 | Relevant   | Vocal  | Relevant, Silent-Vocal   | 3 | 2.8  | 0.5  | 0.8   |
| Kip       | Female | Pastoral | 5.5 | 1 | Relevant   | Silent | Relevant, Silent-Vocal   | 0 | 0.9  | 0    | 13.00 |
| Kip       | Female | Pastoral | 5.5 | 2 | Relevant   | Silent | Relevant, Silent-Vocal   | 1 | 1.7  | 0    | 28.06 |
| Kip       | Female | Pastoral | 5.5 | 3 | Relevant   | Silent | Relevant, Silent-Vocal   | 0 | 0    | 0    | 3.51  |
| Kip       | Female | Pastoral | 5.5 | 4 | Relevant   | Vocal  | Relevant, Silent-Vocal   | 1 | 0.5  | 3    | 1.25  |
| Kip       | Female | Pastoral | 5.5 | 5 | Relevant   | Vocal  | Relevant, Silent-Vocal   | 1 | 9.8  | 0.5  | 5.98  |
| Kip       | Female | Pastoral | 5.5 | 6 | Relevant   | Vocal  | Relevant, Silent-Vocal   | 0 | 0.5  | 0    | 1.55  |
| Kite      | Female | Pastoral | 3.5 | 1 | Relevant   | Silent | Relevant, Vocal-Silent   | 0 | 0.8  | 0    | 2.5   |
| Kite      | Female | Pastoral | 3.5 | 2 | Relevant   | Silent | Relevant, Vocal-Silent   | 0 | 0    | 0    | 0.55  |
| Kite      | Female | Pastoral | 3.5 | 3 | Irrelevant | Silent | Relevant, Vocal-Silent   | 0 | 0    | 1.35 | 17.52 |
| Kite      | Female | Pastoral | 3.5 | 4 | Irrelevant | Vocal  | Relevant, Vocal-Silent   | 0 | 1.6  | 0    | 27.59 |
| Kite      | Female | Pastoral | 3.5 | 5 | Irrelevant | Vocal  | Relevant, Vocal-Silent   | 0 | 0.4  | 0    | 23.67 |
| Kite      | Female | Pastoral | 3.5 | 6 | Irrelevant | Vocal  | Relevant, Vocal-Silent   | 0 | 0    | 0    | 2.3   |
| Krug      | Male   | Gundog   | 4   | 1 | Irrelevant | Silent | Irrelevant, Silent-Vocal | 0 | 0    | 1.35 | 33.05 |
| Krug      | Male   | Gundog   | 4   | 2 | Irrelevant | Silent | Irrelevant, Silent-Vocal | 1 | 1.5  | 0    | 31.12 |
| Krug      | Male   | Gundog   | 4   | 3 | Irrelevant | Silent | Irrelevant, Silent-Vocal | 0 | 0.8  | 0    | 1.5   |
| Krug      | Male   | Gundog   | 4   | 4 | Irrelevant | Vocal  | Irrelevant, Silent-Vocal | 0 | 0    | 0.5  | 0.25  |
| Krug      | Male   | Gundog   | 4   | 5 | Irrelevant | Vocal  | Irrelevant, Silent-Vocal | 1 | 0.75 | 1    | 48.86 |
| Krug      | Male   | Gundog   | 4   | 6 | Irrelevant | Vocal  | Irrelevant, Silent-Vocal | 0 | 0.6  | 0    | 14.24 |
| Levi      | Female | Working  | 1.5 | 1 | Irrelevant | Vocal  | Irrelevant, Vocal-Silent | 0 | 1.7  | 0.5  | 70.79 |
| Levi      | Female | Working  | 1.5 | 2 | Irrelevant | Vocal  | Irrelevant, Vocal-Silent | 0 | 0    | 0    | 63.95 |
| Levi      | Female | Working  | 1.5 | 3 | Irrelevant | Vocal  | Irrelevant, Vocal-Silent | 0 | 0    | 0.45 | 52.50 |
| Levi      | Female | Working  | 1.5 | 4 | Irrelevant | Silent | Irrelevant, Vocal-Silent | 1 | 1.7  | 0.5  | 60.26 |
| Levi      | Female | Working  | 1.5 | 5 | Irrelevant | Silent | Irrelevant, Vocal-Silent | 0 | 2.6  | 1    | 35.06 |
| Levi      | Female | Working  | 1.5 | 6 | Irrelevant | Silent | Irrelevant, Vocal-Silent | 0 | 1.3  | 0.5  | 7.05  |
| Lola      | Female | Cross    | 4   | 1 | Irrelevant | Vocal  | Irrelevant, Silent-Vocal | 0 | 0.5  | 0    | 16.23 |
| Lola      | Female | Cross    | 4   | 2 | Irrelevant | Vocal  | Irrelevant, Silent-Vocal | 0 | 0    | 0.55 | 10.54 |
| Lola      | Female | Cross    | 4   | 3 | Irrelevant | Silent | Irrelevant, Silent-Vocal | 1 | 0.9  | 0.5  | 1.4   |
| Lola      | Female | Cross    | 4   | 4 | Irrelevant | Vocal  | Irrelevant, Silent-Vocal | 0 | 13.0 | 0    | 0.85  |
| Lola      | Female | Cross    | 4   | 5 | Irrelevant | Vocal  | Irrelevant, Silent-Vocal | 0 | 1.2  | 1    | 0.35  |
| Lola      | Female | Cross    | 4   | 6 | Irrelevant | Vocal  | Irrelevant, Silent-Vocal | 0 | 0    | 0.8  | 28.44 |
| Lola      | Female | Cross    | 1.5 | 1 | Irrelevant | Vocal  | Irrelevant, Vocal-Silent | 0 | 1.5  | 0    | 13.17 |
| Lola      | Female | Cross    | 1.5 | 2 | Irrelevant | Vocal  | Irrelevant, Vocal-Silent | 0 | 0    | 0    | 11.42 |
| Lola      | Female | Cross    | 1.5 | 3 | Irrelevant | Vocal  | Irrelevant, Vocal-Silent | 0 | 1.8  | 0    | 14.42 |
| Lola      | Female | Cross    | 1.5 | 4 | Irrelevant | Silent | Irrelevant, Vocal-Silent | 0 | 1    | 0    | 11.43 |
| Lola      | Female | Cross    | 1.5 | 5 | Irrelevant | Silent | Irrelevant, Vocal-Silent | 0 | 4.5  | 0    | 1.15  |
| Lola      | Female | Cross    | 1.5 | 6 | Irrelevant | Silent | Irrelevant, Vocal-Silent | 0 | 2    | 0    | 3.07  |
| Macey     | Female | Gundog   | 6.5 | 1 | Irrelevant | Vocal  | Irrelevant, Vocal-Silent | 0 | 0.3  | 0    | 1.80  |
| Macey     | Female | Gundog   | 6.5 | 2 | Irrelevant | Vocal  | Irrelevant, Vocal-Silent | 3 | 1.8  | 0    | 49.84 |
| Macey     | Female | Gundog   | 6.5 | 3 | Irrelevant | Vocal  | Irrelevant, Vocal-Silent | 0 | 2.2  | 0    | 22.09 |
| Macey     | Female | Gundog   | 6.5 | 4 | Irrelevant | Vocal  | Irrelevant, Vocal-Silent | 0 | 4.5  | 0.5  | 13.71 |
| Macey     | Female | Gundog   | 6.5 | 5 | Irrelevant | Silent | Irrelevant, Vocal-Silent | 1 | 0.6  | 0    | 15.72 |
| Macey     | Female | Gundog   | 6.5 | 6 | Irrelevant | Silent | Irrelevant, Vocal-Silent | 0 | 1.5  | 0    | 15.76 |
| Marcy     | Female | Gundog   | 8.5 | 1 | Relevant   | Vocal  | Relevant, Vocal-Silent   | 0 | 0    | 0    | 7.52  |
| Marcy     | Male   | Gundog   | 8.5 | 2 | Relevant   | Vocal  | Relevant, Vocal-Silent   | 0 | 1.4  | 0    | 41.78 |
| Marcy     | Male   | Gundog   | 8.5 | 3 | Relevant   | Vocal  | Relevant, Vocal-Silent   | 0 | 0    | 5.05 | 24.20 |
| Marcy     | Male   | Gundog   | 8.5 | 4 | Relevant   | Vocal  | Relevant, Vocal-Silent   | 0 | 0    | 0    | 24.03 |
| Marcy     | Male   | Gundog   |     |   |            |        |                          |   |      |      |       |

|        |        |          |     |   |            |        |                         |   |      |     |      |       |
|--------|--------|----------|-----|---|------------|--------|-------------------------|---|------|-----|------|-------|
| MontyS | Male   | Utility  | 5   | 4 | Irrelevant | Silent | Irrelevant_Vocal-Silent | 0 | 0.5  | 1   | 0.25 | 32.28 |
| MontyS | Male   | Utility  | 5   | 5 | Irrelevant | Silent | Irrelevant_Vocal-Silent | 0 | 0    | 0   | 0    | 30.37 |
| MontyS | Male   | Utility  | 5   | 6 | Irrelevant | Silent | Irrelevant_Vocal-Silent | 0 | 0    | 0   | 0    | 24.44 |
| Murphy | Male   | Cross    | 6   | 1 | Relevant   | Silent | Relevant_Silent-Vocal   | 0 | 0    | 2.5 | 4.45 | 17.16 |
| Murphy | Male   | Cross    | 6   | 2 | Relevant   | Silent | Relevant_Silent-Vocal   | 4 | 7.7  | 2.5 | 5.35 | 13.39 |
| Murphy | Male   | Cross    | 6   | 3 | Relevant   | Silent | Relevant_Silent-Vocal   | 1 | 1.8  | 1   | 0.45 | 9.12  |
| Murphy | Male   | Cross    | 6   | 4 | Relevant   | Vocal  | Relevant_Silent-Vocal   | 0 | 0    | 0   | 0    | 13.75 |
| Murphy | Male   | Cross    | 6   | 5 | Relevant   | Vocal  | Relevant_Silent-Vocal   | 1 | 0.5  | 0   | 0    | 3.77  |
| Murphy | Male   | Cross    | 6   | 6 | Relevant   | Vocal  | Relevant_Silent-Vocal   | 0 | 0    | 0   | 0    | 18.63 |
| Nelson | Male   | Gundog   | 9.5 | 1 | Relevant   | Silent | Relevant_Silent-Vocal   | 0 | 0    | 0   | 0    | 33.20 |
| Nelson | Male   | Gundog   | 9.5 | 2 | Relevant   | Silent | Relevant_Silent-Vocal   | 0 | 11.1 | 0   | 0    | 21.88 |
| Nelson | Male   | Gundog   | 9.5 | 3 | Relevant   | Silent | Relevant_Silent-Vocal   | 0 | 1.1  | 0   | 0    | 23.22 |
| Nelson | Male   | Gundog   | 9.5 | 4 | Relevant   | Vocal  | Relevant_Silent-Vocal   | 0 | 0    | 0   | 0    | 21.42 |
| Nelson | Male   | Gundog   | 9.5 | 5 | Relevant   | Vocal  | Relevant_Silent-Vocal   | 0 | 0    | 0   | 0    | 16.48 |
| Nelson | Male   | Gundog   | 9.5 | 6 | Relevant   | Vocal  | Relevant_Silent-Vocal   | 0 | 0    | 0   | 0    | 11.56 |
| Opko   | Male   | Gundog   | 3.5 | 1 | Irrelevant | Silent | Irrelevant_Silent-Vocal | 0 | 0    | 1   | 2.3  | 68.05 |
| Opko   | Male   | Gundog   | 3.5 | 2 | Irrelevant | Silent | Irrelevant_Silent-Vocal | 3 | 1.3  | 0   | 0    | 28.48 |
| Opko   | Male   | Gundog   | 3.5 | 3 | Irrelevant | Silent | Irrelevant_Silent-Vocal | 1 | 0.5  | 0   | 0    | 46.56 |
| Opko   | Male   | Gundog   | 3.5 | 4 | Irrelevant | Vocal  | Irrelevant_Silent-Vocal | 1 | 0    | 0   | 0    | 30.19 |
| Opko   | Male   | Gundog   | 3.5 | 5 | Irrelevant | Vocal  | Irrelevant_Silent-Vocal | 0 | 0    | 0   | 0    | 26.93 |
| Opko   | Male   | Gundog   | 3.5 | 6 | Irrelevant | Vocal  | Irrelevant_Silent-Vocal | 2 | 0.8  | 0   | 0    | 45.51 |
| Oscar  | Male   | Cross    | 1   | 1 | Relevant   | Silent | Relevant_Silent-Vocal   | 0 | 0    | 0.5 | 0.5  | 65.86 |
| Oscar  | Male   | Cross    | 1   | 2 | Relevant   | Silent | Relevant_Silent-Vocal   | 0 | 1    | 0   | 0.7  | 47.85 |
| Oscar  | Male   | Cross    | 1   | 3 | Relevant   | Silent | Relevant_Silent-Vocal   | 2 | 3.7  | 0   | 0    | 56.88 |
| Oscar  | Male   | Cross    | 1   | 4 | Relevant   | Vocal  | Relevant_Silent-Vocal   | 0 | 0    | 0   | 0    | 50.32 |
| Oscar  | Male   | Cross    | 1   | 5 | Relevant   | Vocal  | Relevant_Silent-Vocal   | 4 | 4.2  | 0   | 0    | 28.25 |
| Oscar  | Male   | Cross    | 1   | 6 | Relevant   | Vocal  | Relevant_Silent-Vocal   | 2 | 2.6  | 0   | 0    | 47.57 |
| Ozzie  | Male   | Pastoral | 6   | 1 | Relevant   | Silent | Relevant_Silent-Vocal   | 0 | 0    | 0   | 1.65 | 31.70 |
| Ozzie  | Male   | Pastoral | 6   | 2 | Relevant   | Silent | Relevant_Silent-Vocal   | 0 | 0.6  | 1   | 0.25 | 20.50 |
| Ozzie  | Male   | Pastoral | 6   | 3 | Relevant   | Silent | Relevant_Silent-Vocal   | 5 | 2.3  | 0   | 0    | 31.71 |
| Ozzie  | Male   | Pastoral | 6   | 4 | Relevant   | Vocal  | Relevant_Silent-Vocal   | 2 | 2.5  | 1   | 0    | 10.66 |
| Ozzie  | Male   | Pastoral | 6   | 5 | Relevant   | Vocal  | Relevant_Silent-Vocal   | 0 | 0    | 0   | 0    | 18.35 |
| Ozzie  | Male   | Pastoral | 6   | 6 | Relevant   | Vocal  | Relevant_Silent-Vocal   | 1 | 1    | 0   | 0    | 35.00 |
| Pippa  | Female | Terrier  | 5   | 1 | Irrelevant | Silent | Irrelevant_Silent-Vocal | 0 | 0.9  | 0.5 | 2.5  | 10.44 |
| Pippa  | Female | Terrier  | 5   | 2 | Irrelevant | Silent | Irrelevant_Silent-Vocal | 3 | 7.4  | 0   | 0    | 8.02  |
| Pippa  | Female | Terrier  | 5   | 3 | Irrelevant | Silent | Irrelevant_Silent-Vocal | 0 | 0    | 0   | 0    | 1.52  |
| Pippa  | Female | Terrier  | 5   | 4 | Irrelevant | Silent | Irrelevant_Silent-Vocal | 5 | 3.4  | 0.5 | 1    | 9.28  |
| Pippa  | Female | Terrier  | 5   | 5 | Irrelevant | Vocal  | Irrelevant_Silent-Vocal | 0 | 0    | 0   | 0    | 1.89  |
| Pippa  | Female | Terrier  | 5   | 6 | Irrelevant | Vocal  | Irrelevant_Silent-Vocal | 0 | 0    | 0   | 0    | 11.11 |
| Quito  | Male   | Pastoral | 6   | 1 | Irrelevant | Silent | Irrelevant_Silent-Vocal | 0 | 0    | 0   | 0    | 5.32  |
| Quito  | Male   | Pastoral | 6   | 2 | Irrelevant | Silent | Irrelevant_Silent-Vocal | 0 | 0    | 0.5 | 0.6  | 28.48 |
| Quito  | Male   | Pastoral | 6   | 3 | Irrelevant | Silent | Irrelevant_Silent-Vocal | 0 | 0    | 0   | 0    | 1.52  |
| Quito  | Male   | Pastoral | 6   | 4 | Irrelevant | Vocal  | Irrelevant_Silent-Vocal | 0 | 0    | 1   | 0.65 | 13.23 |
| Quito  | Male   | Pastoral | 6   | 5 | Irrelevant | Vocal  | Irrelevant_Silent-Vocal | 0 | 0.5  | 0   | 0.25 | 29.47 |
| Quito  | Male   | Pastoral | 6   | 6 | Irrelevant | Vocal  | Irrelevant_Silent-Vocal | 1 | 0.5  | 1   | 0.55 | 17.72 |
| Skye   | Female | Cross    | 2   | 1 | Relevant   | Silent | Relevant_Silent-Vocal   | 0 | 1.1  | 1.5 | 1.55 | 17.82 |
| Skye   | Female | Cross    | 2   | 2 | Relevant   | Silent | Relevant_Silent-Vocal   | 2 | 4.6  | 1.5 | 6    | 16.61 |
| Skye   | Female | Cross    | 2   | 3 | Relevant   | Silent | Relevant_Silent-Vocal   | 1 | 0.6  | 0.5 | 1.8  | 6.69  |
| Skye   | Female | Cross    | 2   | 4 | Relevant   | Vocal  | Relevant_Silent-Vocal   | 0 | 0    | 1   | 3.2  | 3.28  |
| Skye   | Female | Cross    | 2   | 5 | Relevant   | Vocal  | Relevant_Silent-Vocal   | 0 | 0    | 1   | 1.05 | 9.97  |
| Skye   | Female | Cross    | 2   | 6 | Relevant   | Vocal  | Relevant_Silent-Vocal   | 1 | 3.7  | 0   | 0.3  | 11.48 |
| Snoopy | Male   | Cross    | 2   | 1 | Irrelevant | Silent | Irrelevant_Silent-Vocal | 0 | 0    | 0   | 0    | 5.83  |
| Snoopy | Male   | Cross    | 2   | 2 | Irrelevant | Silent | Irrelevant_Silent-Vocal | 0 | 2.1  | 0   | 0    | 30.28 |
| Snoopy | Male   | Cross    | 2   | 3 | Irrelevant | Silent | Irrelevant_Silent-Vocal | 0 | 0    | 0.5 | 0    | 18.91 |
| Snoopy | Male   | Cross    | 2   | 4 | Irrelevant | Vocal  | Irrelevant_Silent-Vocal | 0 | 0    | 0   | 0    | 8.70  |
| Snoopy | Male   | Cross    | 2   | 5 | Irrelevant | Vocal  | Irrelevant_Silent-Vocal | 0 | 0    | 0   | 0    | 12.62 |
| Snoopy | Male   | Cross    | 2   | 6 | Irrelevant | Vocal  | Irrelevant_Silent-Vocal | 2 | 1.4  | 0   | 0    | 39.25 |
| Toby   | Male   | Gundog   | 4.5 | 1 | Relevant   | Vocal  | Relevant_Vocal-Silent   | 2 | 1.4  | 0   | 0    | 26.18 |
| Toby   | Male   | Gundog   | 4.5 | 2 | Relevant   | Vocal  | Relevant_Vocal-Silent   | 0 | 0    | 0.5 | 0.95 | 6.89  |
| Toby   | Male   | Gundog   | 4.5 | 3 | Relevant   | Vocal  | Relevant_Vocal-Silent   | 0 | 0    | 2   | 2.6  | 11.33 |
| Toby   | Male   | Gundog   | 4.5 | 4 | Relevant   | Silent | Relevant_Vocal-Silent   | 1 | 1.2  | 0   | 0    | 6.15  |
| Toby   | Male   | Gundog   | 4.5 | 5 | Relevant   | Silent | Relevant_Vocal-Silent   | 2 | 1.1  | 0   | 0.8  | 26.80 |
| Toby   | Male   | Gundog   | 4.5 | 6 | Relevant   | Silent | Relevant_Vocal-Silent   | 0 | 0    | 1.5 | 3.3  | 8.49  |
| Tubby  | Male   | Toy      | 3.5 | 1 | Relevant   | Vocal  | Relevant_Vocal-Silent   | 0 | 0.5  | 0   | 0    | 33.54 |
| Tubby  | Male   | Toy      | 3.5 | 2 | Relevant   | Vocal  | Relevant_Vocal-Silent   | 0 | 2.2  | 0   | 0    | 14.74 |
| Tubby  | Male   | Toy      | 3.5 | 3 | Relevant   | Vocal  | Relevant_Vocal-Silent   | 0 | 1    | 0   | 0.35 | 23.32 |
| Tubby  | Male   | Toy      | 3.5 | 4 | Relevant   | Silent | Relevant_Vocal-Silent   | 1 | 8.5  | 0   | 0    | 26.45 |
| Tubby  | Male   | Toy      | 3.5 | 5 | Relevant   | Silent | Relevant_Vocal-Silent   | 0 | 0    | 0.5 | 0.65 | 51.80 |
| Tubby  | Male   | Toy      | 3.5 | 6 | Relevant   | Silent | Relevant_Vocal-Silent   | 0 | 0    | 0   | 0    | 10.78 |
| Whilma | Female | Hound    | 3   | 1 | Relevant   | Vocal  | Relevant_Vocal-Silent   | 0 | 4.2  | 0   | 0    | 8.16  |
| Whilma | Female | Hound    | 3   | 2 | Relevant   | Vocal  | Relevant_Vocal-Silent   | 0 | 1    | 0   | 3.85 | 20.66 |
| Whilma | Female | Hound    | 3   | 3 | Relevant   | Vocal  | Relevant_Vocal-Silent   | 3 | 1.9  | 1   | 2.35 | 11.94 |
| Whilma | Female | Hound    | 3   | 4 | Relevant   | Silent | Relevant_Vocal-Silent   | 0 | 0.6  | 0   | 1.4  | 6.62  |
| Whilma | Female | Hound    | 3   | 5 | Relevant   | Silent | Relevant_Vocal-Silent   | 3 | 5.2  | 0.5 | 0.65 | 6.33  |
| Whilma | Female | Hound    | 3   | 6 | Relevant   | Silent | Relevant_Vocal-Silent   | 2 | 1    | 0   | 0    | 1.66  |
| Wilson | Male   | Cross    | 1.5 | 1 | Relevant   | Vocal  | Relevant_Vocal-Silent   | 0 | 0    | 0.5 | 1.95 | 37.23 |
| Wilson | Male   | Cross    | 1.5 | 2 | Relevant   | Vocal  | Relevant_Vocal-Silent   | 0 | 0.5  | 0   | 1.55 | 21.35 |
| Wilson | Male   | Cross    | 1.5 | 3 | Relevant   | Vocal  | Relevant_Vocal-Silent   | 0 | 0    | 0   | 0.8  | 36.70 |
| Wilson | Male   | Cross    | 1.5 | 4 | Relevant   | Silent | Relevant_Vocal-Silent   | 0 | 0    | 1   | 4.5  | 21.38 |
| Wilson | Male   | Cross    | 1.5 | 5 | Relevant   | Silent | Relevant_Vocal-Silent   | 0 | 0    | 0   | 0.65 | 14.23 |
| Wilson | Male   | Cross    | 1.5 | 6 | Relevant   | Silent | Relevant_Vocal-Silent   | 0 | 0    | 0   | 0.3  | 17.09 |
| Zippy  | Male   | Cross    | 3   | 1 | Relevant   | Silent | Relevant_Silent-Vocal   | 0 | 0.8  | 1   | 0.5  | 28.39 |
| Zippy  | Male   | Cross    | 3   | 2 | Relevant   | Silent | Relevant_Silent-Vocal   | 0 | 2    | 0.5 | 1.15 | 17.52 |
| Zippy  | Male   | Cross    | 3   | 3 | Relevant   | Silent | Relevant_Silent-Vocal   | 0 | 0    | 0   | 1.2  | 19.03 |
| Zippy  | Male   | Cross    | 3   | 4 | Relevant   | Vocal  | Relevant_Silent-Vocal   | 1 | 1    | 0   | 0.7  | 16.35 |
| Zippy  | Male   | Cross    | 3   | 5 | Relevant   | Vocal  | Relevant_Silent-Vocal   | 3 | 3.7  | 0.5 | 0.35 | 16.72 |
| Zippy  | Male   | Cross    | 3   | 6 | Relevant   | Vocal  | Relevant_Silent-Vocal   | 0 | 0    | 1.5 | 1.65 | 16.14 |
